# Supplementary material for: Non-redox reactivity of V(ii) and Fe(ii) formamidinates towards CO2 resulting in the formation of novel M(ii) carbamates
Source: Royal Society of Chemistry journal article supplement (doi:10.1039/d2dt02274e), 2022-01-01
Supplement: d2dt02274e1.pdf [file d2dt02274e1.pdf]

## **Non-redox reactivity of V(II) and Fe(II) formamidinates towards CO<sub>2</sub> resulting in the formation of novel M(II) carbamates**

Krzysztof Korona,<sup>a</sup> Arkadiusz Kornowicz,<sup>b</sup> Iwona Justyniak,<sup>b</sup> Michał Terlecki,<sup>a</sup> Artur Błachowski,<sup>c</sup> and Janusz Lewiński<sup>a,b\*</sup>

<sup>a</sup> Faculty of Chemistry, Warsaw University of Technology, Noakowskiego 3, 00-664 Warsaw, Poland

<sup>b</sup> Institute of Physical Chemistry, Polish Academy of Sciences, Kasprzaka 44/52, 01-224 Warsaw, Poland

<sup>c</sup> AGH University of Science and Technology, Faculty of Geology, Geophysics and Environmental Protection, al. Mickiewicza 30, 30-059 Kraków, Poland

\*[lewin@ch.pw.edu.pl](mailto:lewin@ch.pw.edu.pl)

## Table of contents

|                                                                                          |    |
|------------------------------------------------------------------------------------------|----|
| 1. Fourier-Transform Infrared attenuated total reflectance (FTIR-ATR) data for 1-6 ..... | 3  |
| 2. <sup>1</sup> H NMR spectra for 4-6.....                                               | 6  |
| 3. X-Ray crystallographic data .....                                                     | 9  |
| 3.1. Complex 1.....                                                                      | 9  |
| 3.2. Complex 2.....                                                                      | 11 |
| 3.3. Complex 3.....                                                                      | 13 |
| 3.4. Complex 4.....                                                                      | 15 |
| 3.5. Complex 5.....                                                                      | 18 |
| 3.6. Complex 6.....                                                                      | 21 |
| 4. Analysis of coordination sphere geometry for 1-6 .....                                | 23 |
| 5. TGA measurement and analysis for compound 6. ....                                     | 25 |
| 6. References .....                                                                      | 25 |

1. Fourier-Transform Infrared attenuated total reflectance (FTIR-ATR) data for 1-6

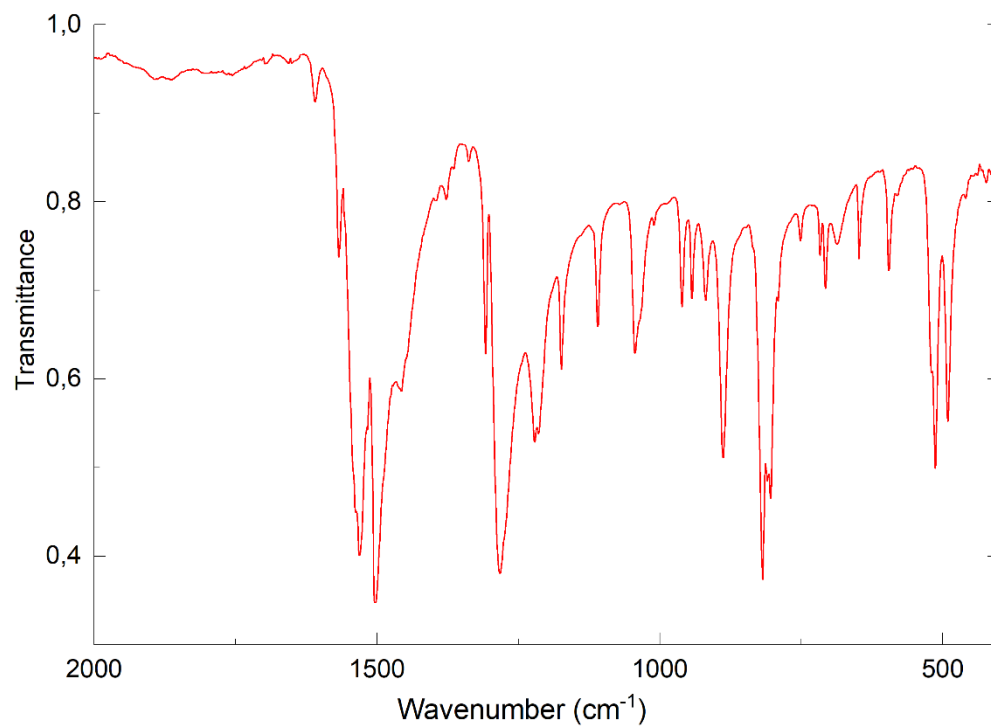

Fig. S1. FTIR spectrum of **1** shown in a range of 2000-400 cm<sup>-1</sup>.

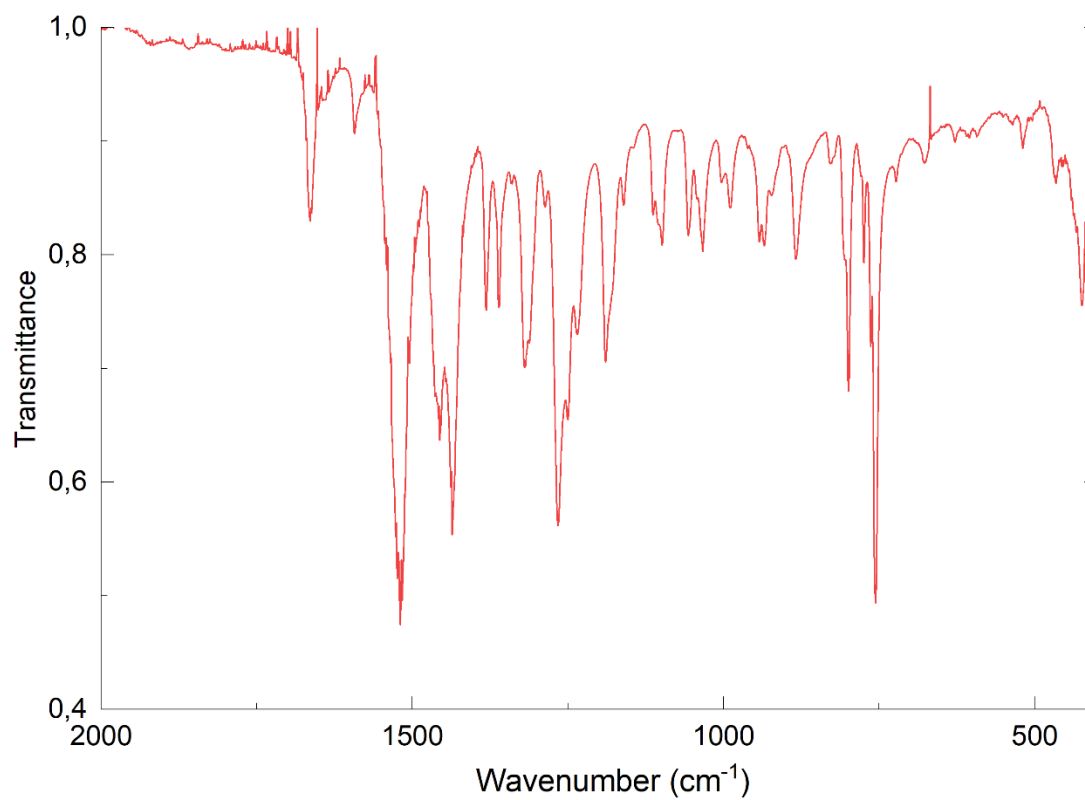

Fig. S2. FTIR spectrum of **2** shown in a range of 2000-400 cm<sup>-1</sup>.

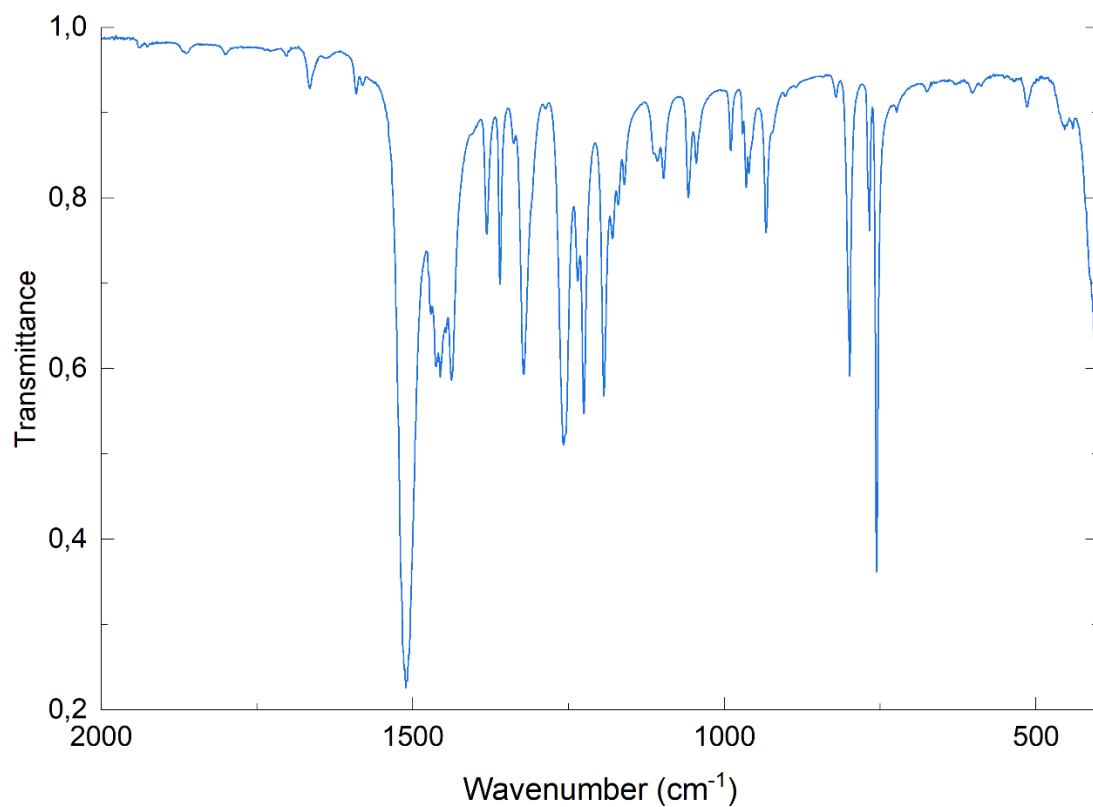

**Fig. S3.** FTIR spectrum of **3** shown in a range of 2000-400 cm<sup>-1</sup>.

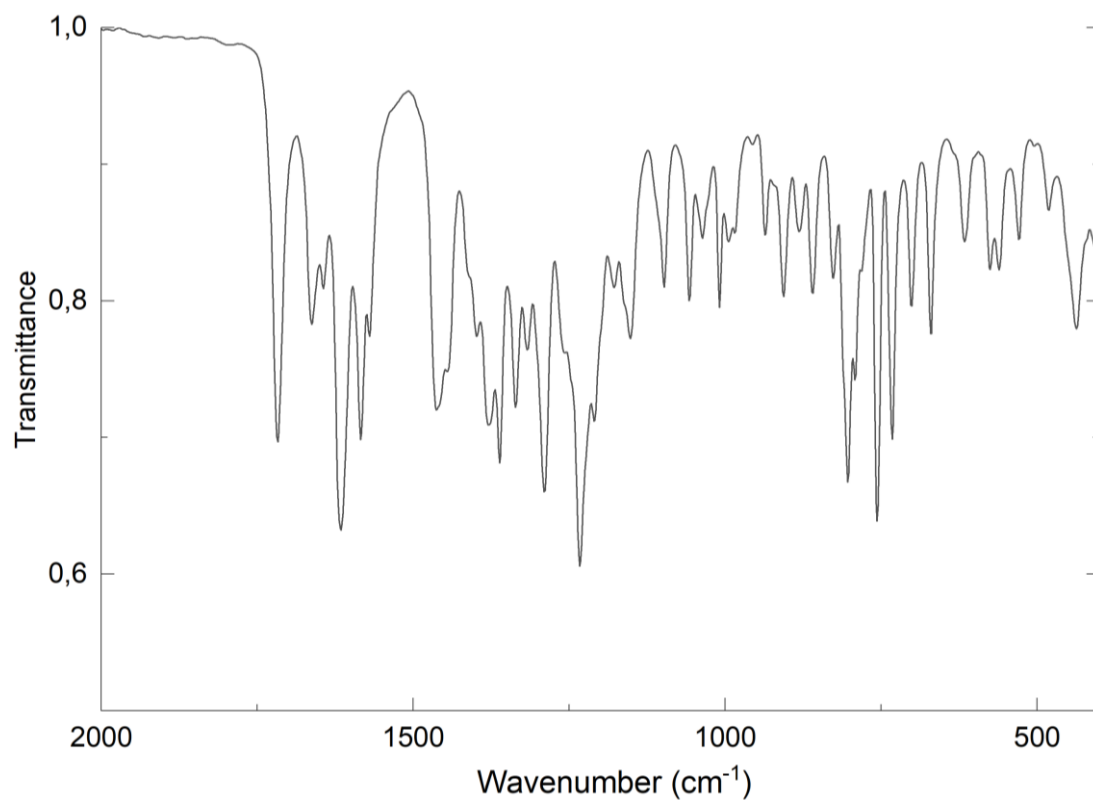

**Fig. S4.** FTIR spectrum of **4** shown in a range of 2000-400 cm<sup>-1</sup>.

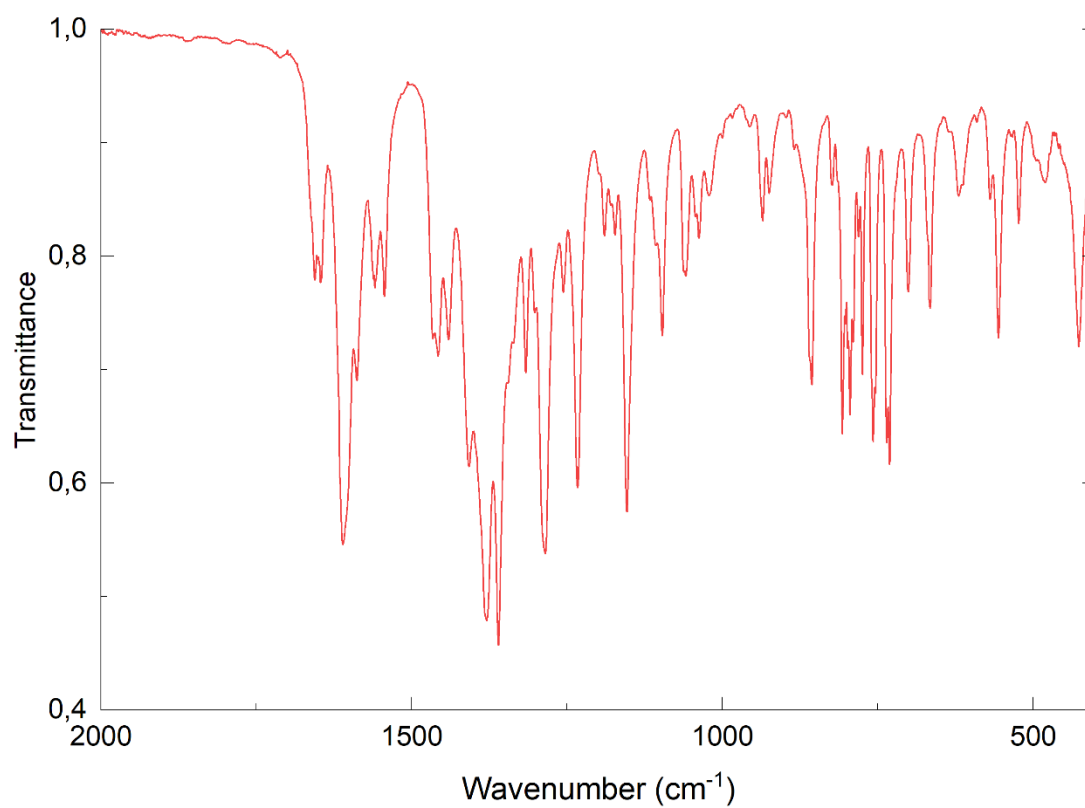

Fig. S5. FTIR spectrum of **5** shown in a range of 2000-400 cm<sup>-1</sup>.

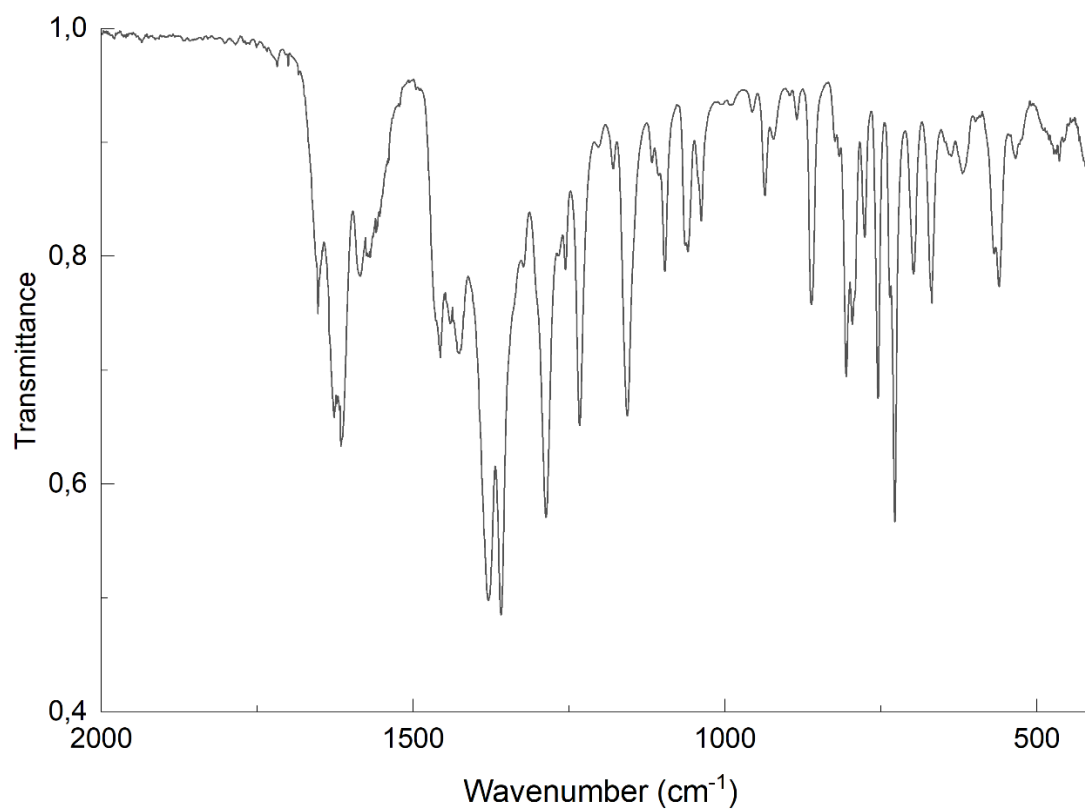

Fig. S6. FTIR spectrum of **6** shown in a range of 2000-400 cm<sup>-1</sup>.

## 2. $^1\text{H}$ NMR spectra for 4-6.

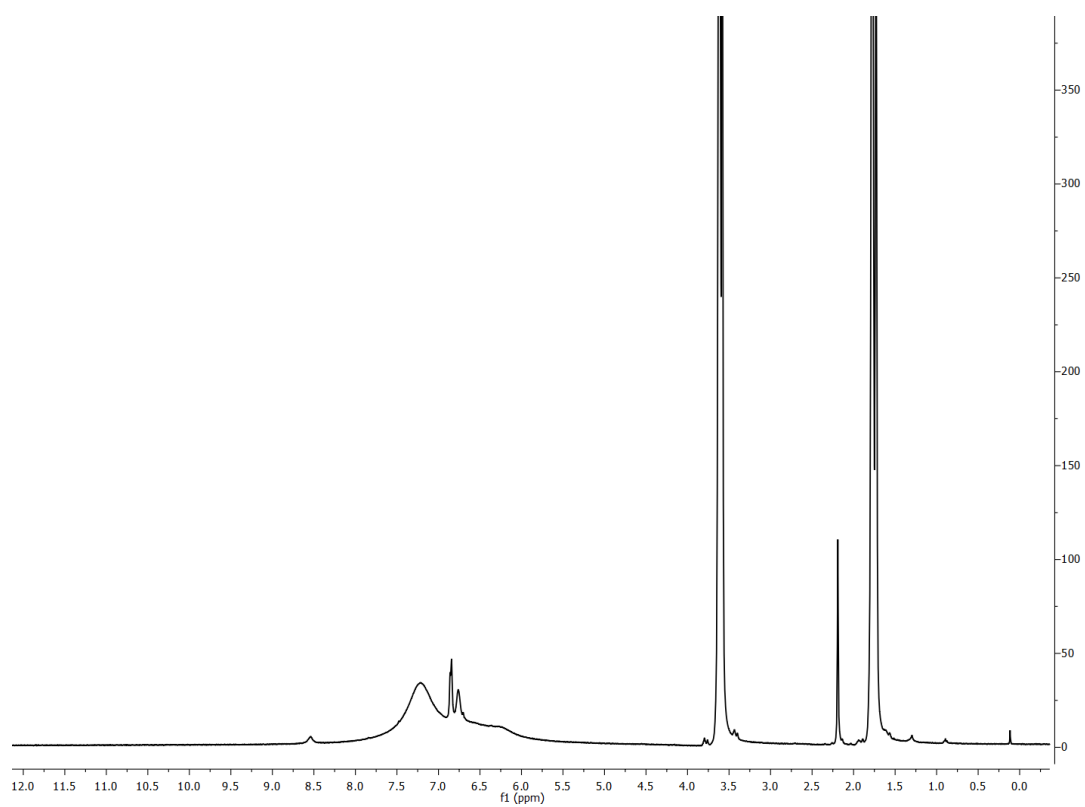

**Fig. S7.**  $^1\text{H}$  NMR spectrum of **1** in  $\text{THF-}d_8$ . The signals from solvent residuals are marked by asterisks.

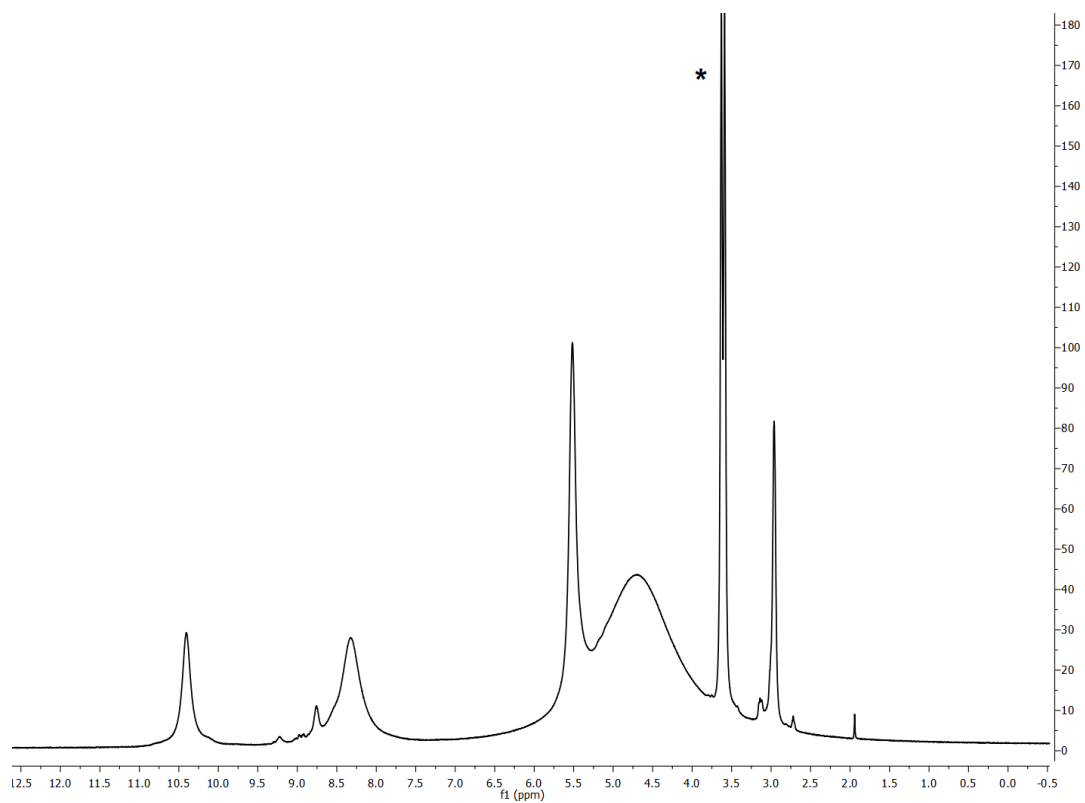

**Fig. S8.**  $^1\text{H}$  NMR spectrum of **2** in  $\text{THF-}d_8$ . The signals from solvent residuals are marked by asterisks.

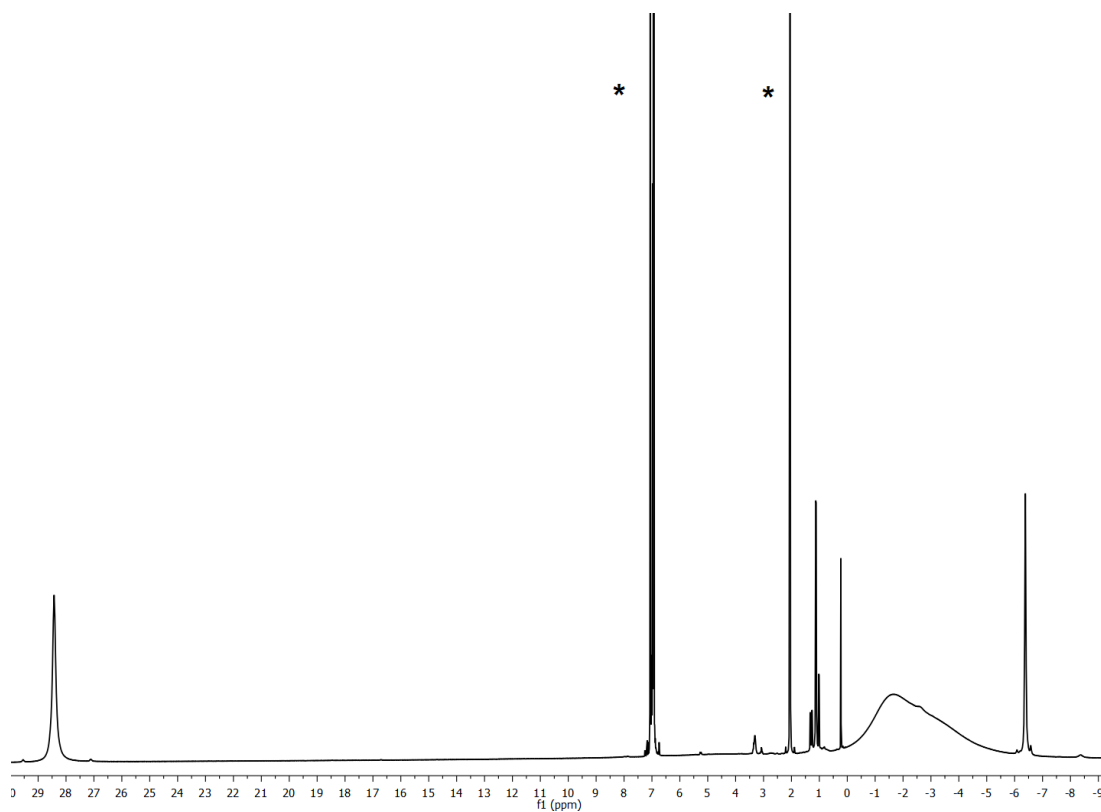

**Fig. S9.**  $^1\text{H}$  NMR spectrum of **3** in toluene- $d_8$ . The signals from solvent residuals are marked by asterisks.

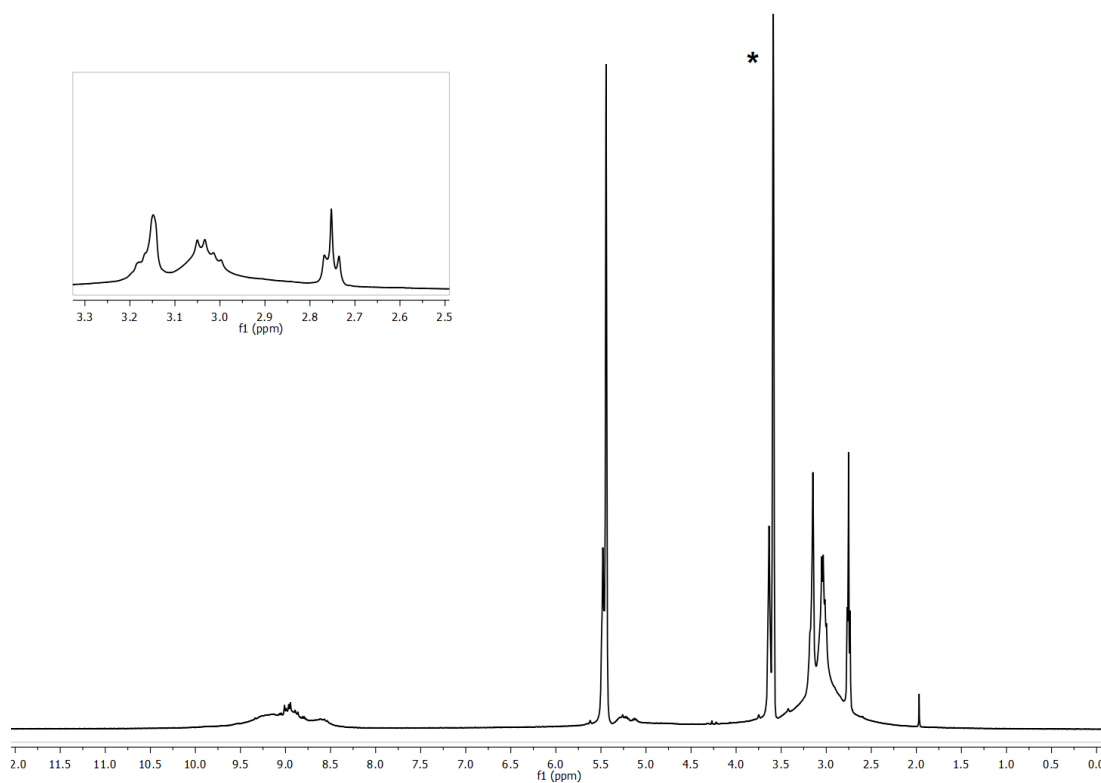

**Fig. S10.**  $^1\text{H}$  NMR spectrum of **4** in THF- $d_8$ . The signals from solvent residuals are marked by asterisks.

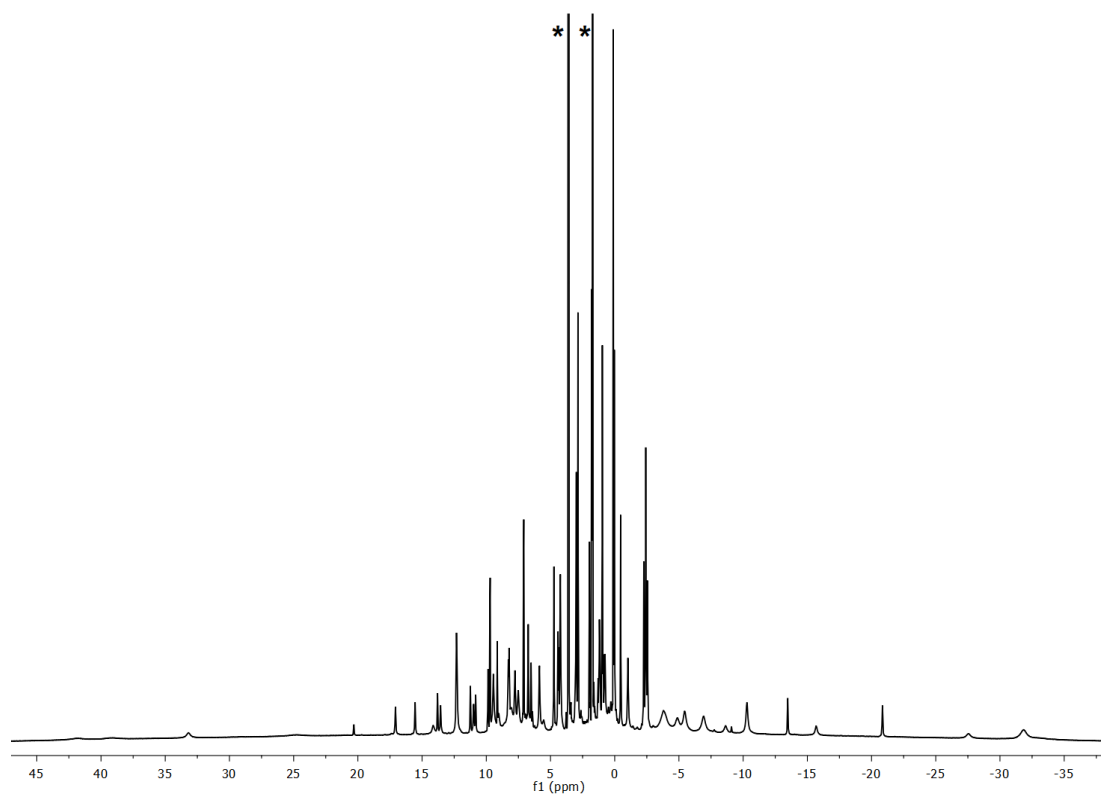

**Fig. S11.**  $^1\text{H}$  NMR spectrum of **5** in  $\text{THF-}d_8$ . The signals from solvent residuals are marked by asterisks.

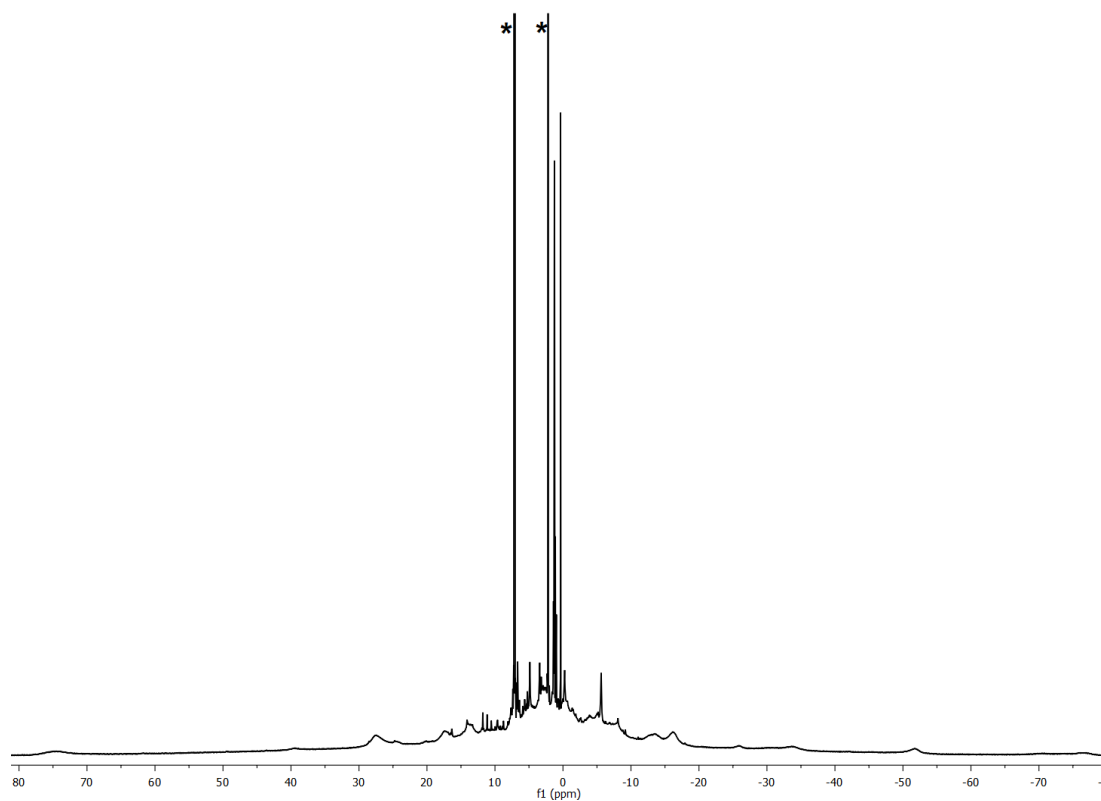

**Fig. S12.**  $^1\text{H}$  NMR spectrum of **6** in  $\text{toluene-}d_8$ . The signals from solvent residuals are marked by asterisks.



### 3. X-Ray crystallographic data

#### 3.1. Complex 1

**Table S1.** Crystal data and structure refinement for **1** (CCDC- 2175762).

|                                   |                                                                             |                  |
|-----------------------------------|-----------------------------------------------------------------------------|------------------|
| Empirical formula                 | C <sub>38</sub> H <sub>46</sub> N <sub>4</sub> O <sub>2</sub> V             |                  |
| Formula weight                    | 641.73                                                                      |                  |
| Temperature                       | 100(2) K                                                                    |                  |
| Wavelength                        | 0.71073 Å                                                                   |                  |
| Crystal system                    | Triclinic                                                                   |                  |
| Space group                       | <i>P</i> -1                                                                 |                  |
| Unit cell dimensions              | a = 9.479(5) Å                                                              | α = 108.573(5)°. |
|                                   | b = 12.620(5) Å                                                             | β = 92.537(5)°.  |
|                                   | c = 15.960(5) Å                                                             | γ = 107.338(5)°. |
| Volume                            | 1707.0(12) Å <sup>3</sup>                                                   |                  |
| Z                                 | 2                                                                           |                  |
| Density (calculated)              | 1.249 Mg/m <sup>3</sup>                                                     |                  |
| Absorption coefficient            | 0.329 mm <sup>-1</sup>                                                      |                  |
| F(000)                            | 682                                                                         |                  |
| Crystal size                      | 0.18 x 0.11 x 0.07 mm <sup>3</sup>                                          |                  |
| Theta range for data collection   | 2.278 to 26.994°.                                                           |                  |
| Index ranges                      | -11<=h<=12, -13<=k<=15, -20<=l<=18                                          |                  |
| Reflections collected             | 13170                                                                       |                  |
| Independent reflections           | 7355 [R(int) = 0.0220]                                                      |                  |
| Completeness to theta = 25.242°   | 99.9 %                                                                      |                  |
| Refinement method                 | Full-matrix least-squares on F <sup>2</sup>                                 |                  |
| Data / restraints / parameters    | 7355 / 0 / 412                                                              |                  |
| Goodness-of-fit on F <sup>2</sup> | 1.039                                                                       |                  |
| Final R indices [I>2σ(I)]         | R <sub>1</sub> <sup>a</sup> = 0.0376, wR <sub>2</sub> <sup>b</sup> = 0.0867 |                  |
| R indices (all data)              | R1 = 0.0462, wR2 = 0.0926                                                   |                  |
| Largest diff. peak and hole       | 0.436 and -0.303 e.Å <sup>-3</sup>                                          |                  |

<sup>a</sup>  $R_1 = \sum ||F_o| - |F_c|| / \sum |F_o|$ . <sup>b</sup>  $wR_2 = [\sum w(F_o^2 - F_c^2)^2 / \sum w(F_o^2)^2]^{1/2}$

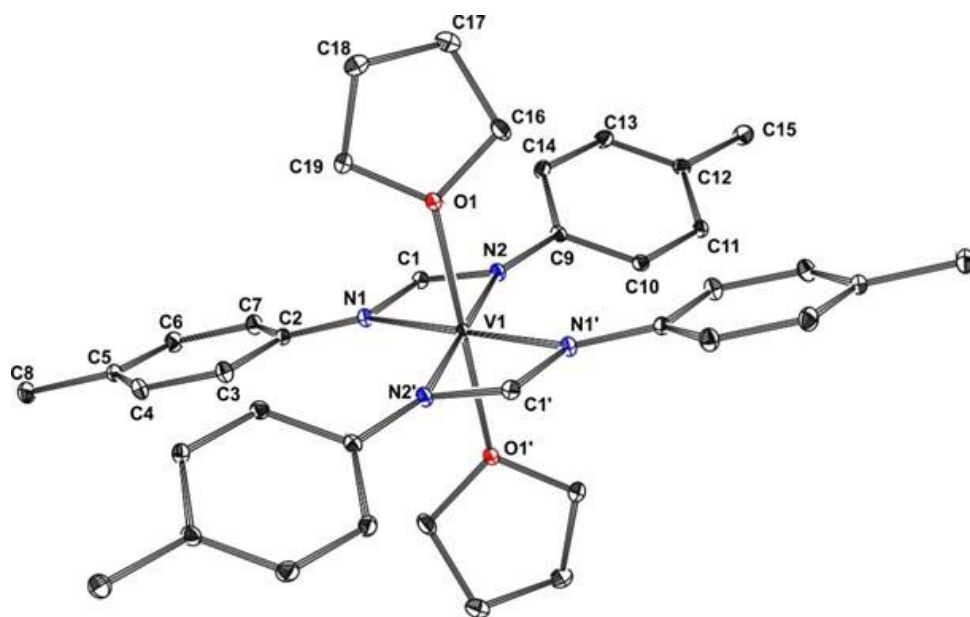

**Fig. S13.** The molecular structure of **1** with thermal ellipsoids set at 30% probability. Hydrogen atoms have been omitted for clarity. Symmetry transformations used to generate equivalent atoms:  $(-x+1, -y+1, -z+2)$ ,  $(x, -y+1, -z+1)$ .

**Table S2.** Selected intermolecular bond lengths [ $\text{\AA}$ ] and angles [ $^\circ$ ] for **1**.

|       |            |           |           |
|-------|------------|-----------|-----------|
| V1-N1 | 2.1953(13) | N1-V1-N2  | 61.23(5)  |
| V1-N2 | 2.1933(14) | N1-V1-O1  | 87.70(5)  |
| V1-O1 | 2.1352(14) | N2-V1-O1  | 90.17(5)  |
| N1-C1 | 1.324(2)   | N1-V1-N1' | 180.00(7) |
| N1-C2 | 1.4013(19) | N1-V1-N2' | 118.77(5) |
| N2-C1 | 1.322(2)   | N2-V1-N2' | 180.00(7) |
| N2-C9 | 1.4039(19) | N2-V1-N1' | 118.77(5) |

### 3.2. Complex 2

**Table S3.** Crystal data and structure refinement for **2** (CCDC-2161489).

|                                        |                                                                    |                              |
|----------------------------------------|--------------------------------------------------------------------|------------------------------|
| Empirical formula                      | $C_{54}H_{78}N_4OV_2$                                              |                              |
| Formula weight                         | 850.19                                                             |                              |
| Temperature                            | 100(2) K                                                           |                              |
| Wavelength                             | 0.71073 Å                                                          |                              |
| Crystal system                         | Monoclinic                                                         |                              |
| Space group                            | $P2_1/n$                                                           |                              |
| Unit cell dimensions                   | $a = 15.2867(3)$ Å                                                 | $\alpha = 90^\circ$ .        |
|                                        | $b = 14.7719(2)$ Å                                                 | $\beta = 107.502(2)^\circ$ . |
|                                        | $c = 25.4469(4)$ Å                                                 | $\gamma = 90^\circ$ .        |
| Volume                                 | $5480.24(17)$ Å <sup>3</sup>                                       |                              |
| Z                                      | 4                                                                  |                              |
| Density (calculated)                   | $1.0304$ Mg/m <sup>3</sup>                                         |                              |
| Absorption coefficient                 | $0.218$ mm <sup>-1</sup>                                           |                              |
| F(000)                                 | 1846                                                               |                              |
| Crystal size                           | $0.19 \times 0.13 \times 0.05$ mm <sup>3</sup>                     |                              |
| Theta range for data collection        | $2.17$ to $26.497^\circ$ .                                         |                              |
| Index ranges                           | $-20 \leq h \leq 16$ , $-20 \leq k \leq 19$ , $-35 \leq l \leq 35$ |                              |
| Reflections collected                  | 49808                                                              |                              |
| Independent reflections                | 11308 [R(int) = 0.0257]                                            |                              |
| Completeness to theta = $25.242^\circ$ | 99.9 %                                                             |                              |
| Data / restraints / parameters         | 11308 / 0 / 557                                                    |                              |
| Goodness-of-fit on F <sup>2</sup>      | 0.8625                                                             |                              |
| Final R indices [ $I > 2\sigma(I)$ ]   | $R_1 = 0.0388$ , $wR_2 = 0.1132$                                   |                              |
| R indices (all data)                   | $R_1 = 0.0461$ , $wR_2 = 0.1218$                                   |                              |
| Largest diff. peak and hole            | $0.552$ and $-0.310$ e.Å <sup>-3</sup>                             |                              |

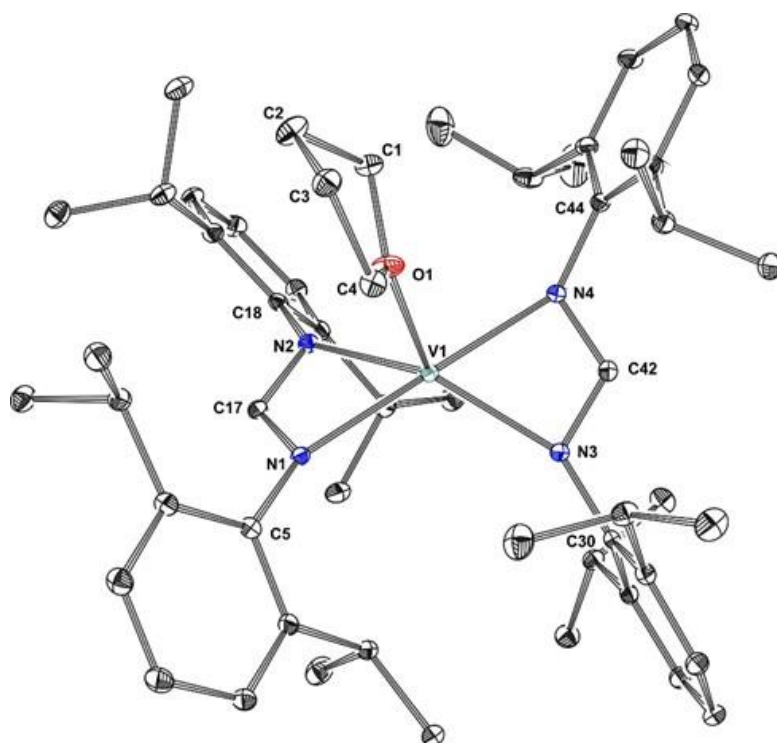

**Fig. S14.** The molecular structure of **2** with thermal ellipsoids set at 30% probability. Hydrogen atoms have been omitted for clarity.

**Table S4.** Selected intermolecular bond lengths [Å] and angles [°] for **2**.

|        |            |          |           |
|--------|------------|----------|-----------|
| V1-O1  | 2.1242(11) | O1-V1-N1 | 90.10(5)  |
| V1-N1  | 2.1601(12) | O1-V1-N2 | 126.97(5) |
| V1-N2  | 2.1332(12) | O1-V1-N3 | 92.24(5)  |
| V1-N3  | 2.1638(12) | O1-V1-N4 | 91.36(5)  |
| V1-N4  | 2.1628(11) | N1-V1-N2 | 63.36(4)  |
| N1-C5  | 1.4209(17) | N1-V1-N3 | 117.06(5) |
| N1-C17 | 1.3176(18) | N1-V1-N4 | 178.45(4) |
| N2-C17 | 1.3371(18) | N2-V1-N3 | 140.26(5) |
| N2-C18 | 1.4277(17) | N2-V1-N4 | 116.03(4) |
| N3-C30 | 1.4276(18) | N3-V1-N4 | 62.37(4)  |
| N3-C42 | 1.3257(18) |          |           |
| N4-C42 | 1.3210(18) |          |           |
| N4-C43 | 1.4190(17) |          |           |

### 3.3. Complex 3

**Table S5.** Crystal data and structure refinement for **3** (CCDC-2161490).

|                                        |                                                                    |                              |
|----------------------------------------|--------------------------------------------------------------------|------------------------------|
| Formula weight                         | 782.95                                                             |                              |
| Temperature                            | 100(2) K                                                           |                              |
| Wavelength                             | 0.71073 Å                                                          |                              |
| Crystal system                         | Monoclinic                                                         |                              |
| Space group                            | $P2_1$                                                             |                              |
| Unit cell dimensions                   | $a = 12.2223(8)$ Å                                                 | $\alpha = 90^\circ$ .        |
|                                        | $b = 16.0549(9)$ Å                                                 | $\beta = 107.628(7)^\circ$ . |
|                                        | $c = 12.3894(9)$ Å                                                 | $\gamma = 90^\circ$ .        |
| Volume                                 | $2317.0(3)$ Å <sup>3</sup>                                         |                              |
| Z                                      | 2                                                                  |                              |
| Density (calculated)                   | $1.122$ Mg/m <sup>3</sup>                                          |                              |
| Absorption coefficient                 | $0.361$ mm <sup>-1</sup>                                           |                              |
| F(000)                                 | 848                                                                |                              |
| Crystal size                           | $0.14 \times 0.09 \times 0.03$ mm <sup>3</sup>                     |                              |
| Theta range for data collection        | $2.411$ to $26.999^\circ$ .                                        |                              |
| Index ranges                           | $-15 \leq h \leq 14$ , $-19 \leq k \leq 19$ , $-15 \leq l \leq 15$ |                              |
| Reflections collected                  | 11640                                                              |                              |
| Independent reflections                | 7617 [R(int) = 0.0324]                                             |                              |
| Completeness to theta = $25.242^\circ$ | 99.8 %                                                             |                              |
| Refinement method                      | Full-matrix least-squares on F <sup>2</sup>                        |                              |
| Data / restraints / parameters         | 7617 / 19 / 516                                                    |                              |
| Goodness-of-fit on F <sup>2</sup>      | 1.034                                                              |                              |
| Final R indices [ $I > 2\sigma(I)$ ]   | $R_1^a = 0.0674$ , $wR_2^b = 0.1686$                               |                              |
| R indices (all data)                   | $R_1 = 0.0730$ , $wR_2 = 0.1759$                                   |                              |
| Largest diff. peak and hole            | $1.493$ and $-0.718$ e.Å <sup>-3</sup>                             |                              |

<sup>a</sup>  $R_1 = \sum ||F_o| - |F_c|| / \sum |F_o|$ . <sup>b</sup>  $wR_2 = [\sum w(F_o^2 - F_c^2)^2 / \sum w(F_o^2)]^{1/2}$

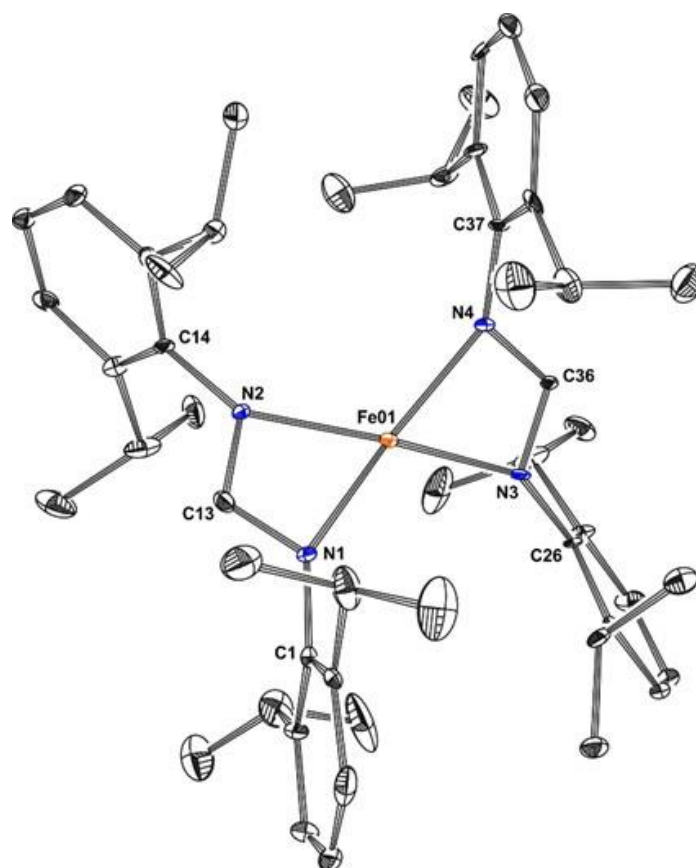

**Fig. S15.** The molecular structure of **3** with thermal ellipsoids set at 30% probability. Hydrogen atoms have been omitted for clarity.

**Table S6.** Selected intermolecular bond lengths [Å] and angles [°] for **3**.

|        |           |           |          |
|--------|-----------|-----------|----------|
| Fe1-N1 | 2.054(6)  | N1-Fe1-N2 | 66.2(2)  |
| Fe1-N2 | 2.034(5)  | N1-Fe1-N3 | 117.2(2) |
| Fe1-N3 | 2.047(6)  | N1-Fe1-N4 | 159.3(2) |
| Fe1-N4 | 2.044(6)  | N2-Fe1-N3 | 158.9(2) |
| N1-C1  | 1.426(10) | N2-Fe1-N4 | 119.0(2) |
| N1-C13 | 1.325(9)  | N3-Fe1-N4 | 66.0(2)  |
| N2-C13 | 1.323(9)  |           |          |
| N2-C14 | 1.435(8)  |           |          |
| N3-C26 | 1.426(8)  |           |          |
| N3-C36 | 1.343(9)  |           |          |
| N4-C36 | 1.309(9)  |           |          |
| N4-C37 | 1.424(9)  |           |          |

### 3.4. Complex 4

**Table S7.** Crystal data and structure refinement for **4** (CCDC-2161491).

|                                   |                                                                                  |                 |
|-----------------------------------|----------------------------------------------------------------------------------|-----------------|
| Empirical formula                 | C <sub>229</sub> H <sub>324</sub> N <sub>16</sub> O <sub>20</sub> V <sub>4</sub> |                 |
| Formula weight                    | 3824.78                                                                          |                 |
| Temperature                       | 293(2) K                                                                         |                 |
| Wavelength                        | 0.71073 Å                                                                        |                 |
| Crystal system                    | Monoclinic                                                                       |                 |
| Space group                       | P2 <sub>1</sub> /n                                                               |                 |
| Unit cell dimensions              | a = 15.3254(4) Å                                                                 | α = 90°.        |
|                                   | b = 48.4643(15) Å                                                                | β = 90.021(2)°. |
|                                   | c = 15.4889(2) Å                                                                 | γ = 90°.        |
| Volume                            | 11504.1(5) Å <sup>3</sup>                                                        |                 |
| Z                                 | 2                                                                                |                 |
| Density (calculated)              | 1.104 Mg/m <sup>3</sup>                                                          |                 |
| Absorption coefficient            | 0.219 mm <sup>-1</sup>                                                           |                 |
| F(000)                            | 4124                                                                             |                 |
| Crystal size                      | 0.18 x 0.11 x 0.07 mm <sup>3</sup>                                               |                 |
| Theta range for data collection   | 2.479 to 26.499°.                                                                |                 |
| Index ranges                      | -12 ≤ h ≤ 16, -60 ≤ k ≤ 36, -19 ≤ l ≤ 5                                          |                 |
| Reflections collected             | 25402                                                                            |                 |
| Independent reflections           | 18423 [R(int) = 0.0285]                                                          |                 |
| Completeness to theta = 25.242°   | 77.2 %                                                                           |                 |
| Refinement method                 | Full-matrix least-squares on F <sup>2</sup>                                      |                 |
| Data / restraints / parameters    | 18423 / 36 / 1305                                                                |                 |
| Goodness-of-fit on F <sup>2</sup> | 1.108                                                                            |                 |
| Final R indices [I > 2σ(I)]       | R <sub>1</sub> <sup>a</sup> = 0.0723, wR <sub>2</sub> <sup>b</sup> = 0.1644      |                 |
| R indices (all data)              | R <sub>1</sub> = 0.0930, wR <sub>2</sub> = 0.1759                                |                 |
| Largest diff. peak and hole       | 0.621 and -0.452 e.Å <sup>-3</sup>                                               |                 |

<sup>a</sup> R<sub>1</sub> = Σ ||F<sub>o</sub>| - |F<sub>c</sub>|| / Σ |F<sub>o</sub>|. <sup>b</sup> wR<sub>2</sub> = [Σ w(F<sub>o</sub><sup>2</sup> - F<sub>c</sub><sup>2</sup>)<sup>2</sup> / Σ w(F<sub>o</sub><sup>2</sup>)<sup>2</sup>]<sup>1/2</sup>

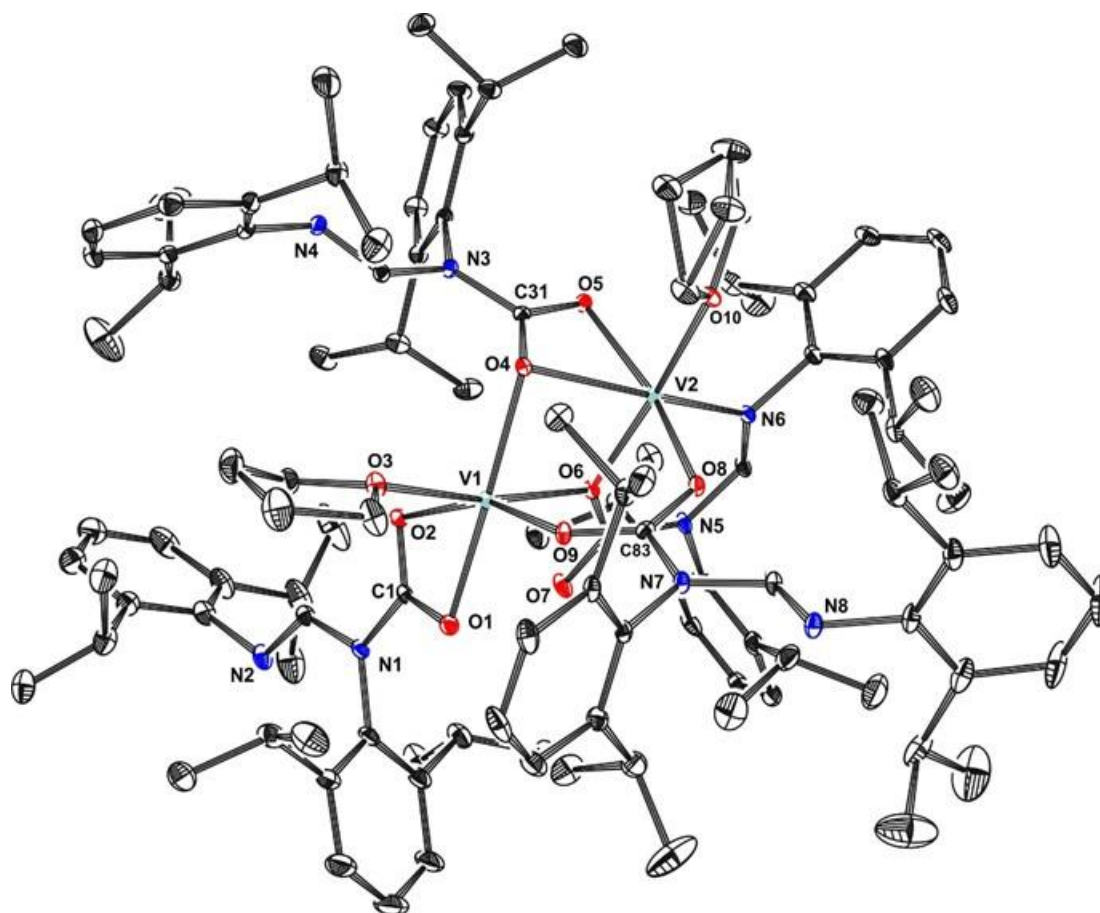

**Fig. S16.** The molecular structure of **4** with thermal ellipsoids set at 30% probability. Hydrogen atoms have been omitted for clarity.

**Table S8.** Selected intermolecular bond lengths [Å] and angles [°] for **4**.

|       |          |          |            |
|-------|----------|----------|------------|
| V1-O1 | 2.168(2) | O1-V1-O2 | 61.60(9)   |
| V1-O2 | 2.126(2) | O1-V1-O3 | 86.75(9)   |
| V1-O3 | 2.177(2) | O1-V1-O4 | 114.72(9)  |
| V1-O4 | 2.203(2) | O1-V1-O6 | 94.26(8)   |
| V1-O6 | 2.146(2) | O1-V1-O9 | 157.55(10) |
| V1-O9 | 2.087(2) | O2-V1-O3 | 90.70(10)  |
| V2-O4 | 2.214(2) | O2-V1-O4 | 176.07(9)  |
| V2-O5 | 2.153(2) | O2-V1-O6 | 99.10(9)   |
| V2-O8 | 2.093(2) | O2-V1-O9 | 96.34(10)  |
| V2-N6 | 2.102(3) | O3-V1-O4 | 90.42(9)   |
|       |          | O3-V1-O6 | 169.36(10) |
|       |          | O3-V1-O9 | 89.58(9)   |
|       |          | O4-V1-O6 | 79.53(8)   |
|       |          | O4-V1-O9 | 87.43(9)   |



|           |           |
|-----------|-----------|
| O6-V1-O9  | 93.40(9)  |
| O4-V2-O5  | 60.90(9)  |
| O4-V2-O8  | 102.50(9) |
| O4-V2-O10 | 92.64(8)  |
| O4-V2-N6  | 155.42(9) |
| O5-V2-O8  | 163.01(9) |
| O5-V2-O10 | 89.28(9)  |
| O5-V2-N6  | 98.82(10) |
| O6-V2-O4  | 81.06(8)  |
| O6-V2-O5  | 91.39(9)  |
| O6-V2-O8  | 89.25(9)  |
| O6-V2-O10 | 172.36(9) |
| O6-V2-N6  | 86.07(9)  |
| O8-V2-O10 | 87.90(9)  |
| O8-V2-N6  | 98.16(11) |

---

### 3.5. Complex 5

**Table S9.** Crystal data and structure refinement for **5** (CCDC- 2161492).

|                                   |                                             |                               |
|-----------------------------------|---------------------------------------------|-------------------------------|
| Empirical formula                 | $C_{221}H_{304}Fe_4N_{16}O_{14}$            |                               |
| Formula weight                    | 3632.18                                     |                               |
| Temperature                       | 100(2) K                                    |                               |
| Wavelength                        | 0.71073 Å                                   |                               |
| Crystal system                    | Monoclinic                                  |                               |
| Space group                       | $P2_1/n$                                    |                               |
| Unit cell dimensions              | $a = 14.00932(15)$ Å                        | $\alpha = 90^\circ$ .         |
|                                   | $b = 64.6462(8)$ Å                          | $\beta = 92.0129(11)^\circ$ . |
|                                   | $c = 25.1469(3)$ Å                          | $\gamma = 90^\circ$ .         |
| Volume                            | 22760.2(5) Å <sup>3</sup>                   |                               |
| Z                                 | 4                                           |                               |
| Density (calculated)              | 1.060 Mg/m <sup>3</sup>                     |                               |
| Absorption coefficient            | 0.307 mm <sup>-1</sup>                      |                               |
| F(000)                            | 7832                                        |                               |
| Crystal size                      | 0.21 x 0.13 x 0.07 mm <sup>3</sup>          |                               |
| Theta range for data collection   | 2.350 to 28.249 °.                          |                               |
| Index ranges                      | -17 ≤ h ≤ 18, -85 ≤ k ≤ 43, -33 ≤ l ≤ 27    |                               |
| Reflections collected             | 96823                                       |                               |
| Independent reflections           | 50059 [R(int) = 0.0405]                     |                               |
| Completeness to theta = 25.242°   | 99.7 %                                      |                               |
| Refinement method                 | Full-matrix least-squares on F <sup>2</sup> |                               |
| Data / restraints / parameters    | 50059 / 87 / 2387                           |                               |
| Goodness-of-fit on F <sup>2</sup> | 1.072                                       |                               |
| Final R indices [I > 2σ(I)]       | $R_1^a = 0.0755$ , $wR_2^b = 0.1411$        |                               |
| R indices (all data)              | $R_1 = 0.0965$ , $wR_2 = 0.1490$            |                               |
| Largest diff. peak and hole       | 0.824 and -0.857 e.Å <sup>-3</sup>          |                               |

<sup>a</sup>  $R_1 = \sum ||F_o| - |F_c| | / \sum |F_o|$ . <sup>b</sup>  $wR_2 = [\sum w(F_o^2 - F_c^2)^2 / \sum w(F_o^2)^2]^{1/2}$

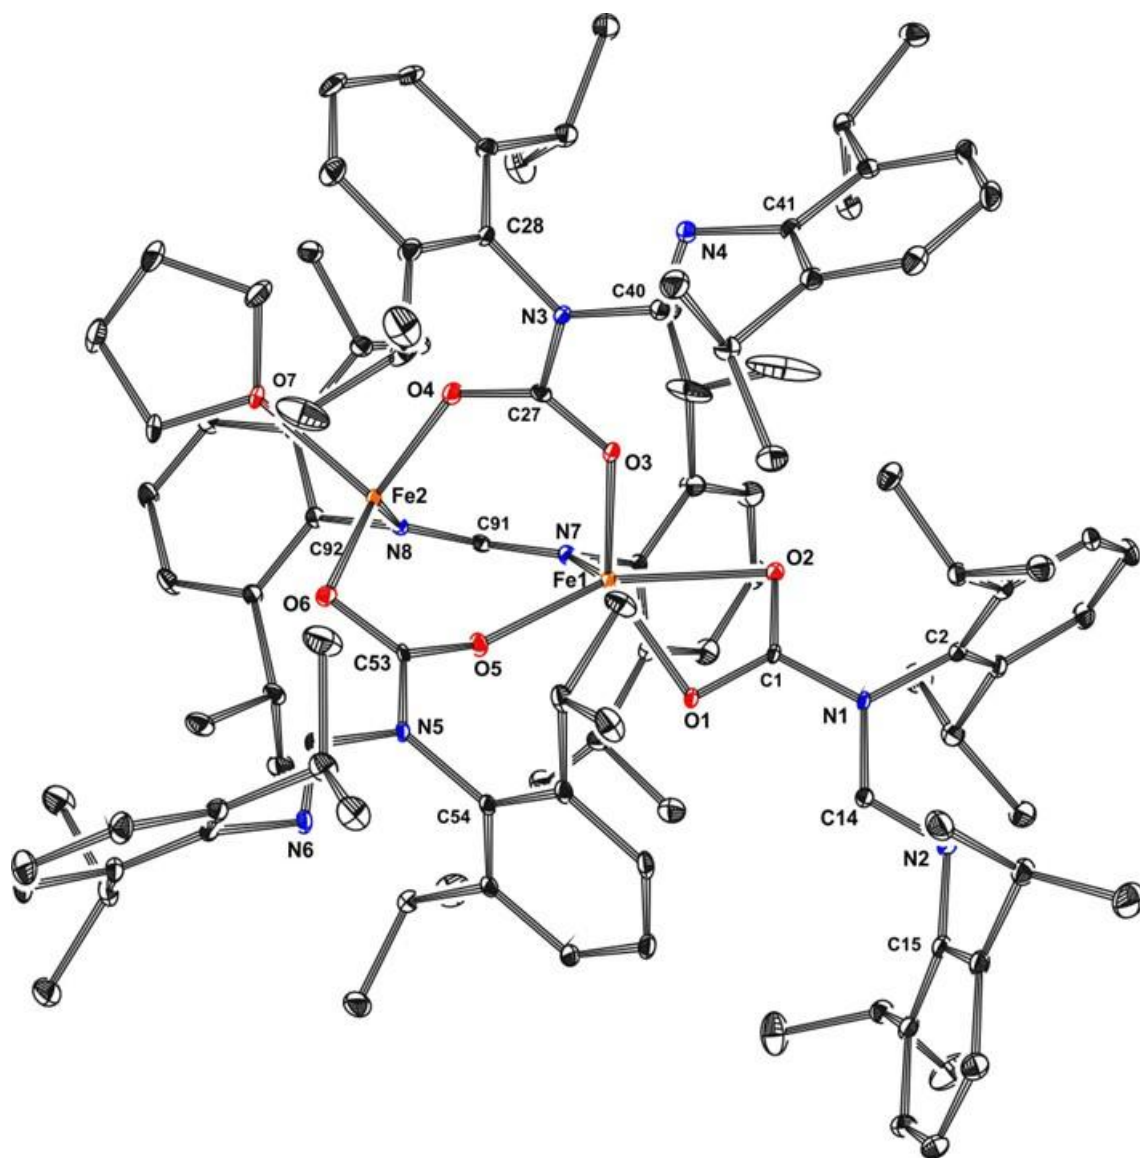

**Fig. S17.** The molecular structure of **5** with thermal ellipsoids set at 30% probability. Hydrogen atoms have been omitted for clarity.

**Table S10.** Selected intermolecular bond lengths [Å] and angles [°] for **5**.

|        |            |           |           |
|--------|------------|-----------|-----------|
| Fe1-O1 | 2.0463(19) | O1-Fe1-O2 | 61.11(7)  |
| Fe1-O2 | 2.273(2)   | O1-Fe1-O3 | 116.57(8) |
| Fe1-O3 | 2.047(2)   | O1-Fe1-O5 | 89.83(8)  |
| Fe1-O5 | 2.111(2)   | O1-Fe1-N7 | 125.58(9) |
| Fe1-N7 | 2.065(3)   | O2-Fe1-O3 | 89.32(8)  |
| Fe2-O4 | 1.986(2)   | O2-Fe1-O5 | 149.79(7) |
| Fe2-O6 | 2.0227(19) | O2-Fe1-N7 | 100.82(8) |
| Fe2-O7 | 2.090(2)   | O3-Fe1-O5 | 97.48(8)  |
| Fe2-N8 | 1.993(2)   | O3-Fe1-N7 | 113.70(8) |
|        |            | O5-Fe1-N7 | 103.19(9) |

|           |           |
|-----------|-----------|
| O4-Fe2-O6 | 105.59(9) |
| O4-Fe2-O7 | 86.71(8)  |
| O4-Fe2-N8 | 120.12(9) |
| O6-Fe2-O7 | 101.22(8) |
| O6-Fe2-N8 | 128.10(9) |
| O7-Fe2-N8 | 104.44(9) |

---

### 3.6. Complex 6

**Table S11.** Crystal data and structure refinement for **6** (CCDC-2161493).

|                                        |                                                                    |                              |
|----------------------------------------|--------------------------------------------------------------------|------------------------------|
| Empirical formula                      | $C_{141}H_{204}Fe_2N_{10}O_8$                                      |                              |
| Formula weight                         | 2278.94                                                            |                              |
| Temperature                            | 100(2) K                                                           |                              |
| Wavelength                             | 0.71073 Å                                                          |                              |
| Crystal system                         | Monoclinic                                                         |                              |
| Space group                            | $P 2_1/n$                                                          |                              |
| Unit cell dimensions                   | $a = 21.550(5)$ Å                                                  | $\alpha = 90.000(5)^\circ$ . |
|                                        | $b = 29.745(5)$ Å                                                  | $\beta = 92.430(5)^\circ$ .  |
|                                        | $c = 22.858(5)$ Å                                                  | $\gamma = 90.000(5)^\circ$ . |
| Volume                                 | $14639(5)$ Å <sup>3</sup>                                          |                              |
| Z                                      | 4                                                                  |                              |
| Density (calculated)                   | $1.034$ Mg/m <sup>3</sup>                                          |                              |
| Absorption coefficient                 | $0.251$ mm <sup>-1</sup>                                           |                              |
| F(000)                                 | 4944                                                               |                              |
| Crystal size                           | $0.16 \times 0.11 \times 0.08$ mm <sup>3</sup>                     |                              |
| Theta range for data collection        | $2.410$ to $26.500^\circ$ .                                        |                              |
| Index ranges                           | $-27 \leq h \leq 19$ , $-27 \leq k \leq 37$ , $-18 \leq l \leq 28$ |                              |
| Reflections collected                  | 256608                                                             |                              |
| Independent reflections                | 30281 [R(int) = 0.0577]                                            |                              |
| Completeness to theta = $25.242^\circ$ | 99.8 %                                                             |                              |
| Data / restraints / parameters         | 30281 / 92 / 1494                                                  |                              |
| Goodness-of-fit on F <sup>2</sup>      | 1.0676                                                             |                              |
| Final R indices [ $I > 2\sigma(I)$ ]   | $R_1 = 0.0516$ , $wR_2 = 0.1198$                                   |                              |
| R indices (all data)                   | $R_1 = 0.0736$ , $wR_2 = 0.1356$                                   |                              |
| Largest diff. peak and hole            | $0.5997$ and $-0.6588$ e.Å <sup>-3</sup>                           |                              |

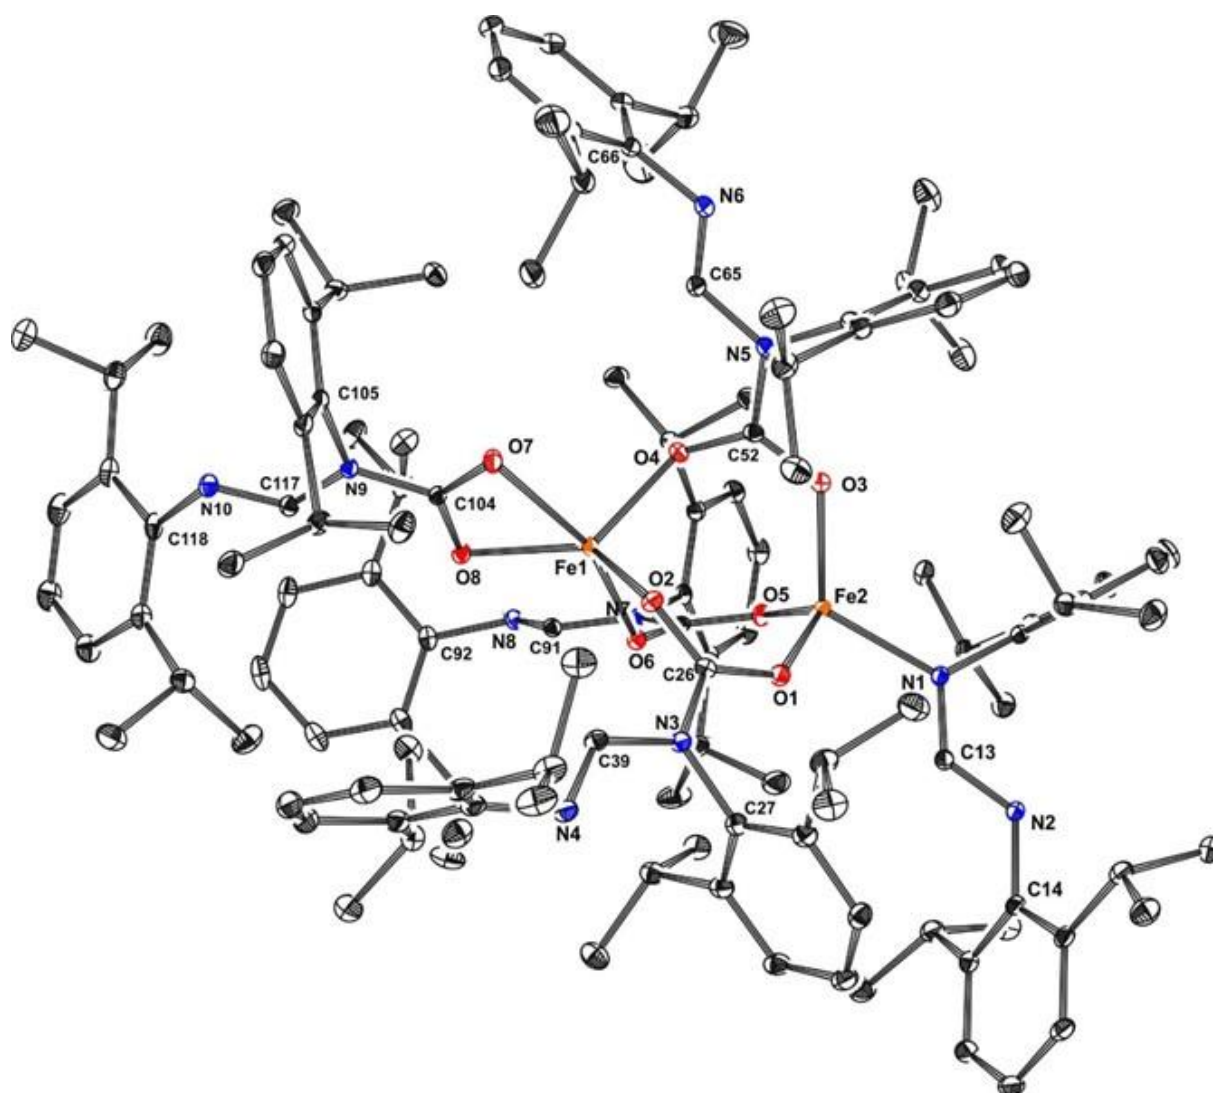

**Fig. S18.** The molecular structure of **6** with thermal ellipsoids set at 30% probability. Hydrogen atoms have been omitted for clarity.

**Table S12.** Selected intermolecular bond lengths [Å] and angles [°] for **6**.

|        |            |           |           |
|--------|------------|-----------|-----------|
| Fe1-O2 | 2.0069(15) | O2-Fe1-O4 | 99.72(6)  |
| Fe1-O4 | 2.0242(15) | O2-Fe1-O6 | 92.94(6)  |
| Fe1-O6 | 2.0555(15) | O2-Fe1-O7 | 100.42(6) |
| Fe1-O7 | 2.1708(16) | O2-Fe1-O8 | 131.32(6) |
| Fe1-O8 | 2.0721(15) | O4-Fe1-O6 | 96.76(6)  |
| Fe2-O1 | 1.9964(15) | O4-Fe1-O7 | 97.93(6)  |
| Fe2-O3 | 1.9916(15) | O4-Fe1-O8 | 126.47(6) |
| Fe2-O5 | 2.0055(15) | O6-Fe1-O7 | 158.14(6) |
| Fe2-N1 | 2.0691(17) | O6-Fe1-O8 | 95.64(6)  |
|        |            | O7-Fe1-O8 | 62.55(6)  |
|        |            | O1-Fe2-O3 | 104.05(6) |
|        |            | O1-Fe2-O5 | 122.80(6) |

|           |           |
|-----------|-----------|
| O1-Fe2-N1 | 93.48(6)  |
| O3-Fe2-O5 | 106.97(6) |
| O3-Fe2-N1 | 119.67(7) |
| O5-Fe2-N1 | 110.32(6) |

#### 4. Analysis of coordination sphere geometry for 1-6

**Table S13.** Analysis of the coordination sphere geometry of V(II) centre in **1** using the continuous shape measurement (CShM).

| Metal centre | SHAPE (CShM)*              |                                       |                              |                                   |                                                  |
|--------------|----------------------------|---------------------------------------|------------------------------|-----------------------------------|--------------------------------------------------|
|              | Hexagon (D <sub>6h</sub> ) | Pentagonal pyramid (C <sub>5v</sub> ) | Octahedron (O <sub>h</sub> ) | Trigonal prism (D <sub>3h</sub> ) | Johnson pentagonal pyramid J2 (C <sub>5v</sub> ) |
| <b>V1</b>    | 23.080                     | 26.938                                | 4.223                        | 16.668                            | 29.107                                           |
| <b>V2</b>    | 23.158                     | 26.734                                | 4.074                        | 16.815                            | 28.814                                           |

\* lower values indicate better fit to given geometry<sup>1-3</sup>

**Table S14.** Analysis of the coordination sphere geometry of V(II) centre in **2** using the continuous shape measurement (CShM).

| Metal centre | SHAPE (CShM)*               |                                      |                                       |                                             |                                                   |
|--------------|-----------------------------|--------------------------------------|---------------------------------------|---------------------------------------------|---------------------------------------------------|
|              | Pentagon (D <sub>5h</sub> ) | Vacant octahedron (C <sub>4v</sub> ) | Trigonal bipyramid (D <sub>3h</sub> ) | Spherical square pyramid (C <sub>4v</sub> ) | Johnson trigonal bipyramid J12 (D <sub>3h</sub> ) |
| <b>V1</b>    | 22.954                      | 8.813                                | 6.640                                 | 8.164                                       | 8.808                                             |

\* lower values indicate better fit to given geometry<sup>1-3</sup>

**Table S15.** Analysis of the coordination sphere geometry of Fe(II) centre in **3** using the continuous shape measurement (CShM).

| Metal centre | SHAPE (CShM)*             |                               |                           |                                              |
|--------------|---------------------------|-------------------------------|---------------------------|----------------------------------------------|
|              | Square (D <sub>4h</sub> ) | Tetrahedron (T <sub>d</sub> ) | Seesaw (C <sub>2v</sub> ) | Vacant trigonal bipyramid (C <sub>3v</sub> ) |
| <b>Fe1</b>   | 8.524                     | 21.609                        | 13.665                    | 23.868                                       |

\* lower values indicate better fit to given geometry<sup>1-3</sup>

**Table S16.** Analysis of the coordination sphere geometry of V(II) centres in **4** using the continuous shape measurement (CShM).

| Metal centre | SHAPE (CShM)*              |                                       |                              |                                   |                                                  |
|--------------|----------------------------|---------------------------------------|------------------------------|-----------------------------------|--------------------------------------------------|
|              | Hexagon (D <sub>6h</sub> ) | Pentagonal pyramid (C <sub>5v</sub> ) | Octahedron (O <sub>h</sub> ) | Trigonal prism (D <sub>3h</sub> ) | Johnson pentagonal pyramid J2 (C <sub>5v</sub> ) |
| <b>V1</b>    | 27.386                     | 21.592                                | 2.860                        | 12.613                            | 24.988                                           |
| <b>V2</b>    | 30.275                     | 21.362                                | 2.310                        | 13.081                            | 25.677                                           |

\* lower values indicate better fit to given geometry<sup>1-3</sup>

**Table S17.** Analysis of the coordination sphere geometry of Fe(II) centres in **5** using the continuous shape measurement (CShM).

| Metal centre | SHAPE (CShM)*               |                                      |                                       |                                              |                                                   |
|--------------|-----------------------------|--------------------------------------|---------------------------------------|----------------------------------------------|---------------------------------------------------|
|              | Pentagon (D <sub>5h</sub> ) | Vacant octahedron (C <sub>4v</sub> ) | Trigonal bipyramid (D <sub>3h</sub> ) | Spherical square pyramid (C <sub>4v</sub> )  | Johnson trigonal bipyramid J12 (D <sub>3h</sub> ) |
| <b>Fe1</b>   | 31.151                      | 7.552                                | 3.112                                 | 4.531                                        | 5.322                                             |
| <b>Fe3</b>   | 30.067                      | 7.081                                | 3.550                                 | 3.728                                        | 5.877                                             |
|              | Square (D <sub>4h</sub> )   | Tetrahedron (T <sub>d</sub> )        | Seesaw (C <sub>2v</sub> )             | Vacant trigonal bipyramid (C <sub>3v</sub> ) |                                                   |
| <b>Fe2</b>   | 31.258                      | 1.868                                | 6.826                                 | 1.554                                        |                                                   |
| <b>Fe4</b>   | 32.995                      | 1.575                                | 6.228                                 | 1.254                                        |                                                   |

\* lower values indicate better fit to given geometry<sup>1-3</sup>



**Table S18.** Analysis of the coordination sphere geometry of Fe(II) centres in **6** using the continuous shape measurement (CShM).

| Metal centre | SHAPE (CShM)*               |                                      |                                       |                                              |                                                   |
|--------------|-----------------------------|--------------------------------------|---------------------------------------|----------------------------------------------|---------------------------------------------------|
|              | Pentagon (D <sub>5h</sub> ) | Vacant octahedron (C <sub>4v</sub> ) | Trigonal bipyramid (D <sub>3h</sub> ) | Spherical square pyramid (C <sub>4v</sub> )  | Johnson trigonal bipyramid J12 (D <sub>3h</sub> ) |
| <b>Fe1</b>   | 27.815                      | 6.303                                | 3.683                                 | 4.602                                        | 5.964                                             |
|              | Square (D <sub>4h</sub> )   | Tetrahedron (T <sub>d</sub> )        | Seesaw (C <sub>2v</sub> )             | Vacant trigonal bipyramid (C <sub>3v</sub> ) |                                                   |
| <b>Fe2</b>   | 24.047                      | 1.439                                | 6.591                                 | 3.677                                        |                                                   |

\* lower values indicate better fit to given geometry<sup>1-3</sup>

## 5. TGA measurement and analysis for compound **6**.

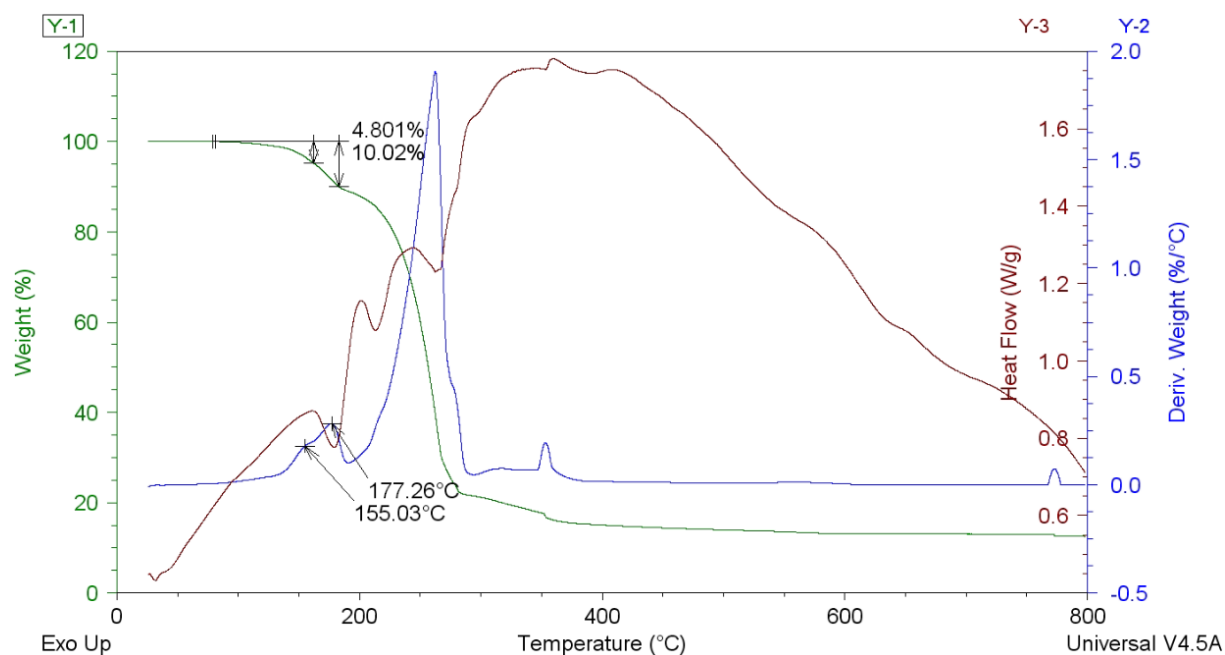

**Fig. S19.** TGA measurement data and analysis for **6**.

## 6. References

- 1 H. Zabrodsky, S. Peleg and D. Avnir, *J. Am. Chem. Soc.*, 1992, **114**, 7843–7851.
- 2 M. Pinsky and D. Avnir, *Inorg. Chem.*, 1998, **37**, 5575–5582.
- 3 M. LLunell, D. Casanova, J. Cierera, P. Alemany and S. Alvarez, *SHAPE*, v. 2.1.
